# Supplementary material for: Unravelling the Complexity of Inherited Retinal Dystrophies Molecular Testing: Added Value of Targeted Next-Generation Sequencing
Source: Hindawi journal article supplement (doi:10.1155/2016/6341870), 2016-01-01
Supplement: f1 [file 6341870.f1.pdf]

Supplemental Table 2

| Gene symbol | Gene title                                                    | Retinal diseases*                                                                                                                                   |
|-------------|---------------------------------------------------------------|-----------------------------------------------------------------------------------------------------------------------------------------------------|
| ABCA4       | ATP-binding cassette transporter - retinal                    | recessive Stargardt disease, juvenile and late onset; recessive MD; recessive RP; recessive fundus flavimaculatus; recessive CORD                   |
| AiPL1       | arylhydrocarbon-interacting receptor protein-like 1           | recessive LCA; dominant CORD                                                                                                                        |
| ARL2BP      | ADP-ribosylation factor-like 2 binding protein                | recessive RP                                                                                                                                        |
| BEST1       | bestrophin 1                                                  | dominant MD, Best type; dominant vitreoretinopathology; recessive bestrophinopathy; recessive RP; dominant RP                                       |
| C2orf71     | chromosome 2 open reading frame 71                            | recessive RP                                                                                                                                        |
| C8orf37     | chromosome 8 open reading frame 37                            | recessive CORD; recessive RP with early macular involvement                                                                                         |
| CA4         | carbonic anhydrase IV                                         | dominant RP                                                                                                                                         |
| CABP4       | calcium binding protein 4                                     | recessive congenital stationary night blindness; recessive congenital cone-rod synaptic disease; recessive LCA                                      |
| CEP290      | centrosomal protein 290 kDa                                   | recessive Senior-Loken syndrome; recessive Joubert syndrome; recessive LCA; recessive Meckel syndrome                                               |
| CERKL       | ceramide kinase-like protein                                  | recessive RP; recessive CORD with inner retinopathy                                                                                                 |
| CLRN1       | clarin-1                                                      | recessive Usher syndrome, type 3; recessive RP                                                                                                      |
| CNGA1       | rod cGMP-gated channel alpha subunit                          | recessive RP                                                                                                                                        |
| CNGB1       | rod cGMP-gated channel beta subunit                           | recessive RP                                                                                                                                        |
| CNGB3       | cone cyclic nucleotide-gated cation channel beta 3 subunit    | recessive achromatopsia Pingelapese; recessive, progressive COD                                                                                     |
| CRB1        | crumbs homolog 1                                              | recessive RP with para-arteriolar preservation of the RPE (PPRPE); recessive RP; recessive LCA; dominant pigmented paravenous chorioretinal atrophy |
| CRX         | cone-rod otx-like photoreceptor homeobox transcription factor | dominant CORD; recessive, dominant and de novo LCA; dominant RP                                                                                     |
| DHDDS       | dehydrolipichyl diphosphate synthetase                        | recessive RP                                                                                                                                        |
| ELOVL4      | elongation of very long fatty acids protein                   | dominant MD, Stargardt-like; recessive spinocerebellar ataxia; recessive ichthyosis, quadriplegia and retardation                                   |
| EYS         | eyes shut/spacemaker (Drosophila) homolog                     | recessive RP                                                                                                                                        |
| FAM161A     | family with sequence similarity 161 member A                  | recessive RP                                                                                                                                        |
| FSCN2       | retinal fascin homolog 2, actin bundling protein              | dominant RP; dominant MD                                                                                                                            |
| GUCA1B      | guanylate cyclase activating protein 1B                       | dominant RP; dominant MD                                                                                                                            |
| GUCY2D      | retinal-specific guanylate cyclase                            | recessive LCA; dominant CORD                                                                                                                        |
| IDH3B       | NAD(+)-specific isocitrate dehydrogenase 3 beta               | recessive RP                                                                                                                                        |
| IMPDH1      | inosine monophosphate dehydrogenase 1                         | dominant RP; dominant LCA                                                                                                                           |
| IMPG2       | interphotoreceptor matrix                                     | recessive RP                                                                                                                                        |

|        |                                                             |                                                                                                                                                                               |
|--------|-------------------------------------------------------------|-------------------------------------------------------------------------------------------------------------------------------------------------------------------------------|
|        | proteoglycan 2                                              |                                                                                                                                                                               |
| IQCB1  | IQ motif containing B1 protein                              | recessive Senior-Loken syndrome; recessive LCA                                                                                                                                |
| KCNJ13 | inwardly-rectifying potassium channel subfamily J member 13 | dominant vitreoretinal degeneration, snowflake; recessive LCA                                                                                                                 |
| KLHL7  | kelch-like 7 protein (Drosophila)                           | dominant RP                                                                                                                                                                   |
| LCA5   | lebercilin                                                  | recessive LCA                                                                                                                                                                 |
| LRAT   | lecithin retinol acyltransferase                            | recessive RP, severe early-onset; recessive LCA                                                                                                                               |
| MAK    | male germ-cell associated kinase                            | recessive retinitis pigmentosa                                                                                                                                                |
| MERTK  | c-mer protooncogene receptor tyrosine kinase                | recessive RP; recessive rod-COD, early onset                                                                                                                                  |
| NMNAT1 | nicotinamide nucleotide adenylyltransferase 1               | recessive LCA                                                                                                                                                                 |
| NR2E3  | nuclear receptor subfamily 2 group E3                       | recessive enhanced S-cone syndrome (ESC); recessive RP in Portuguese Crypto Jews; recessive Goldmann-Favre syndrome; dominant RP; combined dominant and recessive retinopathy |
| NRL    | neural retina luciferase zipper                             | dominant RP; recessive RP                                                                                                                                                     |
| OFD1   | oral-facial-digital syndrome 1 protein                      | Jobert syndrome; orofaciocigital syndrome 1, Simpson-Golabi-Behmel syndrome 2; X-linked RP, severe                                                                            |
| ORP1   | RP1 protein                                                 | dominant RP; recessive RP                                                                                                                                                     |
| OTX2   | orthodenticle homeobox 2 protein                            | dominant LCA and pituitary dysfunction; recessive microphthalmia                                                                                                              |
| PDE6A  | cGMP phosphodiesterase alpha subunit                        | recessive RP                                                                                                                                                                  |
| PDE6B  | rod cGMP phosphodiesterase beta subunit                     | recessive RP; dominant congenital stationary night blindness                                                                                                                  |
| PDE6G  | phosphodiesterase 6G cGMP-specific rod gamma                | recessive RP                                                                                                                                                                  |
| PRCD   | progressive rod-cone degeneration protein                   | recessive RP                                                                                                                                                                  |
| PROM1  | prominin 1                                                  | recessive RP with macular degeneration; dominant Stargardt-like MD; dominant MD, bull's-eye; dominant CORD                                                                    |
| PRPF3  | pre-mRNA processing factor 3                                | dominant RP                                                                                                                                                                   |
| PRPF31 | pre-mRNA processing factor 31                               | dominant RP                                                                                                                                                                   |
| PRPF6  | pre-mRNA processing factor 6                                | dominant RP                                                                                                                                                                   |
| PRPF8  | pre-mRNA processing factor 8                                | dominant RP                                                                                                                                                                   |
| PRPH2  | peripherin 2                                                | dominant RP; dominant MD; digenic RP with ROM1; dominant adult vitelliform MD; dominant CORD; dominant central areolar choroidal dystrophy; recessive LCA                     |
| RBP3   | retinol binding protein 3, interstitial                     | recessive RP                                                                                                                                                                  |
| RD3    | RD3 protein                                                 | recessive LCA                                                                                                                                                                 |
| RDH12  | retinol dehydrogenase 12                                    | recessive LCA with severe childhood retinal dystrophy; dominant RP                                                                                                            |
| RGR    | RPE-retinal G protein-coupled receptor                      | recessive RP; dominant choroidal sclerosis                                                                                                                                    |
| RHO    | rhodopsin                                                   | dominant RP; dominant congenital stationary night                                                                                                                             |

|          |                                                      |                                                                                                                   |
|----------|------------------------------------------------------|-------------------------------------------------------------------------------------------------------------------|
|          |                                                      | blindness; recessive RP                                                                                           |
| RLBP1    | retinaldehyde-binding protein 1                      | recessive RP; recessive Bothnia dystrophy; recessive retinitis punctata albescens; recessive Newfoundland rod-COD |
| ROM1     | retinal outer segment membrane protein 1             | dominant RP; digenic RP with PRPH2                                                                                |
| RP1      | RP1 protein                                          | dominant RP; recessive RP                                                                                         |
| RP1L1    | retinitis pigmentosa 1-like protein 1                | dominant occult MD; recessive RP                                                                                  |
| RP2      | retinitis pigmentosa 2 (X-linked)                    | X-linked RP; X-linked RP, dominant                                                                                |
| RP9      | RP9 protein or PIM1-kinase associated protein 1      | dominant RP                                                                                                       |
| RPE65    | retinal pigment epithelium-specific 65 kD protein    | recessive LCA; recessive RP; dominant RP with choroidal involvement                                               |
| RPGR     | retinitis pigmentosa GTPase regulator                | X-linked RP, recessive; X-linked RP, dominant; X-linked COD 1; X-linked atrophic MD, recessive                    |
| RPGRIP1  | RP GTPase regulator-interacting protein 1            | recessive LCA; recessive CORD                                                                                     |
| SAG      | arrestin (s-antigen)                                 | recessive Oguchi disease; recessive RP                                                                            |
| SEMA4A   | semaphorin 4A                                        | dominant RP; dominant CORD                                                                                        |
| SNRNP200 | small nuclear ribonucleoprotein 200kDa (U5)          | dominant RP                                                                                                       |
| SPATA7   | spermatogenesis associated protein 7                 | recessive LCA; recessive RP, juvenile                                                                             |
| TOPORS   | topoisomerase I binding arginine/serine rich protein | dominant RP                                                                                                       |
| TTC8     | tetratricopeptide repeat domain 8                    | recessive Bardet-Biedl syndrome; recessive RP                                                                     |
| TULP1    | tubby-like protein 1                                 | recessive RP; recessive LCA                                                                                       |
| USH2A    | usherin                                              | recessive Usher syndrome, type 2a; recessive RP                                                                   |
| ZNF513   | zinc finger protein 513                              | recessive RP                                                                                                      |

COD: cone dystrophy; CORD: cone-rod dystrophy; LCA: Leber congenital amaurosis;  
MD: macular dystrophy; RP: retinitis pigmentosa

\* as listed in Retnet, the Retinal Information Network (<https://sph.uth.edu/retnet/home.htm>)

Supplementary Table 3. Primers used for PCR and Sanger sequencing

| Primers                           | Sequence                             | PCR product |
|-----------------------------------|--------------------------------------|-------------|
| CNGB3_13F                         | 5'-ACAGGCTTCAACCTATCACCGGAA-3'       | 548bp       |
| CNGB3_13R                         | 5'-ACCCAGACTGTCTCTGGAGTGGCA-3'       |             |
| RPGR_F1                           | 5'-TTCCCATTTCCCTGTGTGTTAGT-3'        | 1363bp      |
| RPGR_R1                           | 5'-GTAGTTCAGGAGCAGAACTGG-3'          |             |
| RPGR_F2                           | 5'-CTGTCTCCTGATACTTCCCCTCT-3'        | 1339bp      |
| RPGR_R2                           | 5'-TCAGATGACCTTACAGACAAAGCA-3'       |             |
| Additional primers for sequencing |                                      |             |
| RPGR_F3                           | 5'-CTCCTTCCTCCCCTTCCACCTCCCTTCCA-3'  |             |
| RPGR_R3                           | 5'-AGTGGAGGGAGAACGTGAAA-3'           |             |
| RPGR_R4                           | 5'-GGAGGGAGGGGAAGTAGAGGGAGGGGAAGT-3' |             |
